# Supplementary material for: Exploiting the Therapeutic Interaction of WNT Pathway Activation and Asparaginase for Colorectal Cancer Therapy
Source: Oxford University Press journal article supplement (doi:10.1158/2159-8290.cd-19-1472), 2020-07-23
Supplement: 21598290cd191472-sup-233975_2_table_6419946_qdd2h5.xlsx [file 21598290cd191472-sup-233975_2_table_6419946_qdd2h5.xlsx]

## Sheet: Sheet1
Table S1. Genotypes of Human CRC Cell Lines and Patient-Derived Xenograft (PDX) Models at APC, CTNNB1, TP53 and KRAS
No CTNNB1 mutations were identified in any sample.
PDX models were also genotyped for RSPO2 or RSPO3 fusions, which were not identified.
Model Type	Model ID	Gene ID	Annotation Transcript	cDNA or gDNA change1	Protein Change	Mutation Type
PDX2	COCA8	APC	NM_000038.4	c.4666insA	p.T1556fs*3	Biallelic
		KRAS	NM_004985.3	c.34G>C	p.G12R	Monoallelic
PDX2	COCA9	APC	NM_000038.4	c.904C>T	p.R302*	Monoallelic
		TP53	NM_001126112	c.713G>A	p.C238Y	Monoallelic
		KRAS	NM_004985.3	c.35G>T	p.G12V	Monoallelic
Cell Line3	HCT-15	APC	ENST00000457016.1	g.112173471G>T	p.R727M	Monoallelic
		APC	ENST00000457016.1	g.112174270G>T	p.K993N	Monoallelic
		APC	ENST00000457016.1	g.112175974G>T	p.K1561N	Monoallelic
		APC	ENST00000457016.1	g.112176628A>G	p.I1779M	Monoallelic
		APC	ENST00000457016.1	g.112177787C>T	p.R2166*	Monoallelic
		APC	ENST00000457016.1	g.112178939G>C	p.E2550Q	Monoallelic
		APC	ENST00000457016.1	g.112175539delC	p.G1416fs	Biallelic
		TP53	ENST00000269305.4	g.7577559G>A	p.S241F	Monoallelic
		TP53	ENST00000269305.4	g.7573010T>G	Splice site	Monoallelic
		KRAS	ENST00000256078.4	g.25398281C>T	p.G13D	Monoallelic
Cell Line3	SW-480	APC	ENST00000457016.1	g.112175303C>T	p.Q1338*	Biallelic
		TP53	ENST00000269305.4	g.7577120C>T	p.R273H	Biallelic
		TP53	ENST00000269305.4	g.7576921G>A	p.P309S	Biallelic
		KRAS	ENST00000256078.4	g.25398284C>A	p.G12V	Biallelic
1cDNA, coding DNA; gDNA, genomic DNA (gDNA numbering based on NCBI genome build 37).
2Sequencing of patient-derived xenograft models was performed using clinical targeted exon/fusion capture and sequencing, Sholl et al JCI Insight 2016;1:e87062.
3Sequencing of cell lines is from the Cancer Cell Line Encyclopedia, Barretina et al Nature 2012;483:603.
