# Supplementary material for: Exploiting the Therapeutic Interaction of WNT Pathway Activation and Asparaginase for Colorectal Cancer Therapy
Source: Oxford University Press journal article supplement (doi:10.1158/2159-8290.cd-19-1472), 2020-07-23
Supplement: 21598290cd191472-sup-233975_2_table_6419947_qdd2h5.xlsx [file 21598290cd191472-sup-233975_2_table_6419947_qdd2h5.xlsx]

## Sheet: Sheet1
Table S2. Primer Sequences, Related to Key Resource Table.
Primer Name	Primer Sequence
Human b-actin F	CTGGCACCCAGCACAATG
Human b-actin R	GCCGATCCACACGGAGTACT
Human GSK3a F	TCCCCAGCGGGCACTACCA
Human GSK3a R	TGAGGGTAGGTGTGG CATCGGT
Human GSK3b F	CCAGGGGATAGTGGTGTGGATCAGT
Human GSK3b R	GAAGACCCGCACTCCTGAGCTGA
Human ASNS F	TGCACGCCCTCTATGACAATGTGG
Human ASNS R	TTCAGCTGCTTCAACAGAGTGGCA
Human GLUL F	TAACCTCGCTCTCGCGGCCT
Human GLUL R	CATGGTGGAAGGTGTTCTGGTCGC
Human SCL1A5 F	CAGGCGGCTACTGCGGTT
Human SCL1A5 R	GTTGGAAGGGAAGATATTTCTCGCA
Human SCL38A1 F	TGCAATCGGCCCGGAAAGGA
Human SCL38A1 R	AAAATGGAAGCTTGACACCCCTGT
Human SCL38A3 F	CAACCGCGAGGCCAGACATC
Human SCL38A3 R	AAGGCGCCTCCATGGCTCAG
Human SCL1A7 F	GGACCATTATCGGCTCGGGCAT
Human SCL1A7 R	GATTGGACACATCACCCTTCCCG
